# Supplementary material
Source: HighWire-hosted journal article supplement (https://bmjopen.bmj.com/content/15/1/e088111)
Supplement: inline-supplementary-material-1 [file inline-supplementary-material-1.pdf]

Table S1. Search strategy

| Databases | Search Terms                                                                                                                                                                                                                                                                                                                                                                                                                                                                                                                                                                                                                                                                                                                                                                                                                                                                                                                                                                                                                                                                                                                                                                                                                                                                                                                                                                                                                                                                                                                                                                                    |
|-----------|-------------------------------------------------------------------------------------------------------------------------------------------------------------------------------------------------------------------------------------------------------------------------------------------------------------------------------------------------------------------------------------------------------------------------------------------------------------------------------------------------------------------------------------------------------------------------------------------------------------------------------------------------------------------------------------------------------------------------------------------------------------------------------------------------------------------------------------------------------------------------------------------------------------------------------------------------------------------------------------------------------------------------------------------------------------------------------------------------------------------------------------------------------------------------------------------------------------------------------------------------------------------------------------------------------------------------------------------------------------------------------------------------------------------------------------------------------------------------------------------------------------------------------------------------------------------------------------------------|
| PubMed    | <p>#1"Sedentary Behavior"[MeSH Terms] OR "sedentary behavior"[Title/Abstract] OR "sedentary lifestyle"[Title/Abstract] OR "sedentary time"[Title/Abstract] OR "sedent*" [Title/Abstract] OR "sitting time"[Title/Abstract] OR "screen time"[Title/Abstract]</p> <p>#2"Coronary Disease"[MeSH Terms] OR "Coronary Artery Disease"[MeSH Terms] OR "Acute Coronary Syndrome"[MeSH Terms] OR "Myocardial Infarction"[MeSH Terms] OR "Angina, Unstable"[MeSH Terms] OR "Angina, Stable"[MeSH Terms] OR "Myocardial Ischemia"[MeSH Terms] OR "coronary artery disease"[Title/Abstract] OR "coronary heart disease"[Title/Abstract] OR "acute coronary syndrome"[Title/Abstract] OR "myocardial infarction"[Title/Abstract] OR "angina"[Title/Abstract] OR "myocardial ischemia"[Title/Abstract]</p> <p>#3"Health Behavior"[MeSH Terms] OR "Attitude to Health"[MeSH Terms] OR "Patient Compliance"[MeSH Terms] OR "Socioeconomic Factors"[MeSH Terms] OR "Treatment Refusal"[MeSH Terms] OR "barrier*" [Title/Abstract] OR "attend*" [Title/Abstract] OR "adhere*" [Title/Abstract] OR "participat*" [Title/Abstract] OR "attitude*" [Title/Abstract] OR "belief*" [Title/Abstract] OR "compliance" [Title/Abstract] OR "concordance" [Title/Abstract] OR "perception*" [Title/Abstract] OR "prognostic" [Title/Abstract] OR "predictor*" [Title/Abstract] OR "facilit*" [Title/Abstract] OR "enabler*" [Title/Abstract] OR "driver*" [Title/Abstract] OR "motivat*" [Title/Abstract] OR "engag*" [Title/Abstract] OR "intention*" [Title/Abstract]</p> <p>#4 #1 AND #2 AND #3</p> <p>Result: 561</p> |
| Medline   | <p>#1(sedentary behavior OR sedentary lifestyle OR sedentary time OR sitting time OR screen time).mp.</p> <p>#2(coronary disease OR coronary artery disease OR coronary heart disease OR acute coronary syndrome OR myocardial infarction OR angina OR myocardial ischemia).mp.</p> <p>#3(health behavior OR attitude to health OR patient compliance OR treatment refusal OR barrier* OR attend* OR adhere* OR participat* OR attitude* OR belief* OR compliance OR concordance OR perception* OR prognostic OR predictor* OR facilit* OR enabler* OR driver* OR motivat* OR engag* OR intention*).mp.</p> <p>#4 #1 AND #2 AND #3</p> <p>Result: 245</p>                                                                                                                                                                                                                                                                                                                                                                                                                                                                                                                                                                                                                                                                                                                                                                                                                                                                                                                                       |
| Embase    | <p>#1'sedentary behavior':ab,ti OR 'sedentary lifestyle':ab,ti OR 'sedentary time':ab,ti OR 'sitting time':ab,ti OR 'screen time':ab,ti</p>                                                                                                                                                                                                                                                                                                                                                                                                                                                                                                                                                                                                                                                                                                                                                                                                                                                                                                                                                                                                                                                                                                                                                                                                                                                                                                                                                                                                                                                     |

|                                |                                                                                                                                                                                                                                                                                                                                                                                                                                                                                                                                                                                                                                                                                                                                                                |
|--------------------------------|----------------------------------------------------------------------------------------------------------------------------------------------------------------------------------------------------------------------------------------------------------------------------------------------------------------------------------------------------------------------------------------------------------------------------------------------------------------------------------------------------------------------------------------------------------------------------------------------------------------------------------------------------------------------------------------------------------------------------------------------------------------|
|                                | <div>#2'coronary disease':ab,ti OR 'coronary artery disease':ab,ti OR 'coronary heart disease':ab,ti OR 'acute coronary syndrome':ab,ti OR 'myocardial infarction':ab,ti OR angina:ab,ti OR 'myocardial ischemia':ab,ti</div> <div>#3'socioeconomics'/exp OR 'patient compliance'/exp OR 'attitude to health'/exp OR 'health behavior'/exp OR barrier*:ab,ti OR attend*:ab,ti OR adhere*:ab,ti OR participat*:ab,ti OR attitude*:ab,ti OR belief*:ab,ti OR compliance:ab,ti OR concordance:ab,ti OR perception*:ab,ti OR prognostic:ab,ti OR predictor*:ab,ti OR facilit*:ab,ti OR enabler*:ab,ti OR driver*:ab,ti OR motivat*:ab,ti OR engag*:ab,ti OR intention*:ab,ti</div> <div>#4 #1 AND #2 AND #3</div> <div>Result: 377</div>                           |
| CINAHL                         | <div>#1SU sedentary behavior OR SU sedentary lifestyle OR SU sedentary time OR SU sitting time OR SU screen time</div> <div>#2SU coronary disease OR SU coronary artery disease OR SU coronary heart disease OR SU acute coronary syndrome OR SU myocardial infarction OR SU angina OR SU myocardial ischemia</div> <div>#3 SU health behavior OR SU attitude to health OR SU patient compliance OR SU treatment refusal OR SU barrier* OR SU attend* OR SU adhere* OR SU participat* OR SU attitude* OR SU belief* OR SU compliance OR SU concordance OR SU perception* OR SU prognostic OR SU predictor* OR SU facilit* OR SU enabler* OR SU driver* OR SU motivat* OR SU engag* OR SU intention*</div> <div>#4 #1 AND #2 AND #3</div> <div>Result: 39</div> |
| Web of Science Core Collection | <div>#1TS=(sedentary behavior OR sedentary lifestyle OR sedentary time OR sitting time OR screen time)</div> <div>#2TS=(coronary disease OR coronary artery disease OR coronary heart disease OR acute coronary syndrome OR myocardial infarction OR angina OR myocardial ischemia)</div> <div>#3TS=(health behavior OR attitude to health OR patient compliance OR treatment refusal OR barrier* OR attend* OR adhere* OR participat* OR attitude* OR belief* OR compliance OR concordance OR perception* OR prognostic OR predictor* OR facilit* OR enabler* OR driver* OR motivat* OR engag* OR intention*)</div> <div>#4 #1 AND #2 AND #3</div> <div>Result: 1806</div>                                                                                    |
| Scopus                         | <div>#1(TITLE-ABS-KEY(sedentary behavior) OR TITLE-ABS-KEY(sedentary lifestyle) OR TITLE-ABS-KEY(sedentary time) OR TITLE-ABS-KEY(sitting time) OR TITLE-ABS-KEY(screen time))</div> <div>#2(TITLE-ABS-KEY(coronary disease) OR TITLE-ABS-KEY(coronary artery disease) OR TITLE-ABS-KEY(coronary heart disease) OR</div>                                                                                                                                                                                                                                                                                                                                                                                                                                       |

|         |                                                                                                                                                                                                                                                                                                                                                                                                                                                                                                                                                                                                                                                                                                                                                                                                                                                                |
|---------|----------------------------------------------------------------------------------------------------------------------------------------------------------------------------------------------------------------------------------------------------------------------------------------------------------------------------------------------------------------------------------------------------------------------------------------------------------------------------------------------------------------------------------------------------------------------------------------------------------------------------------------------------------------------------------------------------------------------------------------------------------------------------------------------------------------------------------------------------------------|
|         | TITLE-ABS-KEY(acute coronary syndrome) OR TITLE-ABS-KEY(myocardial infarction) OR TITLE-ABS-KEY(angina) OR TITLE-ABS-KEY(myocardial ischemia))<br>#3(TITLE-ABS-KEY(health behavior) OR TITLE-ABS-KEY(attitude to health) OR TITLE-ABS-KEY(patient compliance) OR TITLE-ABS-KEY(treatment refusal) OR TITLE-ABS-KEY(barrier*) OR TITLE-ABS-KEY(attend*) OR TITLE-ABS-KEY(adhere*) OR TITLE-ABS-KEY(participat*) OR TITLE-ABS-KEY(attitude*) OR TITLE-ABS-KEY(belief*) OR TITLE-ABS-KEY(compliance) OR TITLE-ABS-KEY(concordance) OR TITLE-ABS-KEY(prospective) OR TITLE-ABS-KEY(perception*) OR TITLE-ABS-KEY(prognostic) OR TITLE-ABS-KEY(predictor*) OR TITLE-ABS-KEY(facilit*) OR TITLE-ABS-KEY(enabler*) OR TITLE-ABS-KEY(driver*) OR TITLE-ABS-KEY(motivat*) OR TITLE-ABS-KEY(engag*) OR TITLE-ABS-KEY(intention*))<br>#4 #1 AND #2 AND #3<br>Result: 1279 |
| CNKI    | “久坐”（关键词） OR “静态行为”（关键词） AND “冠心病”（关键词）<br>Result: 3                                                                                                                                                                                                                                                                                                                                                                                                                                                                                                                                                                                                                                                                                                                                                                                                           |
| WanFang | 题名或关键词:(久坐 or 静态行为) and 题名或关键词:(冠心病)<br>Result: 21                                                                                                                                                                                                                                                                                                                                                                                                                                                                                                                                                                                                                                                                                                                                                                                                             |
| VIP     | (题名或关键词=(久坐 OR 静态行为)) AND 题名或关键词=冠心病<br>Result: 21                                                                                                                                                                                                                                                                                                                                                                                                                                                                                                                                                                                                                                                                                                                                                                                                             |

Table S2. The characteristics of the included studies

| Authors, Year of publication, Country       | Type of Study | Sample size | Age (years), mean (SD)                                               | Main findings                                                                                                                                                                  |
|---------------------------------------------|---------------|-------------|----------------------------------------------------------------------|--------------------------------------------------------------------------------------------------------------------------------------------------------------------------------|
| Brummett et al, 2003, USA                   | Observational | 1250        | 51 (8)                                                               | Depressive symptoms were positively related to sedentary behavior                                                                                                              |
| Brummett et al, 2005, USA                   | Observational | 2711        | 62.4 (10.9)                                                          | Perceived social support was negatively related to sedentary behavior                                                                                                          |
| Devi et al, 2014, UK                        | Experimental  | 94          | Intervention group<br>66.27 (8.35)<br>Control group<br>66.20 (10.06) | An Internet-based secondary prevention intervention could improve patients' daily steps, energy expenditure, duration of sedentary activity, and duration of moderate activity |
| Ramadi et al, 2016, Canada                  | Experimental  | 44          | Intervention group<br>64 (7)<br>Control group<br>61 (10)             | Sedentary time decreased from baseline to 12 weeks. However, at 6 months, it was comparable with the baseline level                                                            |
| Thakkar et al, 2015, Australia              | Experimental  | 710         | Intervention group<br>57.9 (9.1)<br>Control group<br>57.3 (9.3)      | The TEXT ME intervention improved recreational and travel physical activity, reduced sedentary times but had no effects on work-related physical activity                      |
| Pogosova et al, 2017, 24 European countries | Observational | 7589        | 64.1 (9.6)                                                           | Anxiety and depression were associated with more sedentary lifestyle                                                                                                           |
| ter Hoeve et al, 2017, Netherlands          | Experimental  | 135         | 58.8 (8.5)                                                           | Multidisciplinary cardiac rehabilitation reduced patient sedentary time, and sedentary time became more fragmented with more breaks and shorter                                |

|                                    |               |     |                                                                   |                                                                                                                                                                                                                                                                                    |
|------------------------------------|---------------|-----|-------------------------------------------------------------------|------------------------------------------------------------------------------------------------------------------------------------------------------------------------------------------------------------------------------------------------------------------------------------|
|                                    |               |     |                                                                   | sedentary behavior periods                                                                                                                                                                                                                                                         |
| Biswas et al, 2018, Canada         | Qualitative   | 15  | 63 (10.6)                                                         | Patients placed little importance on reducing sedentary behavior as they were unconvinced of the health benefits, did not perceive themselves to be sedentary, or associated such behaviors with enjoyment and relaxation                                                          |
| Prince et al, 2018, Canada         | Experimental  | 40  | Intervention group<br>62.4 (10.7)<br>Control group<br>61.5 (9.7)  | ActivPAL devices decreased sedentary time by prompting cues to interrupt sedentary behavior                                                                                                                                                                                        |
| da Silva Costa et al, 2019, Brazil | Observational | 123 | 31-80 years old                                                   | Related factors: insufficient motivation for physical activity, insufficient resources for physical activity, insufficient knowledge of health benefits associated with physical exercise, insufficient training for physical exercise, insufficient interest in physical activity |
| Duran et al, 2019, USA             | Observational | 149 | 62.8 (11.2)                                                       | Non-Hispanic ethnicity, left ventricular ejection fraction <40%, lower physical health-related quality of life, and not having a partner were associated with an increased likelihood of being in the high sedentary group                                                         |
| Maddison et al, 2019, New Zealand  | Experimental  | 162 | Intervention group<br>61.0 (13.2)<br>Control group<br>61.5 (12.2) | REMOTE-Cardiac Rehabilitation participants were less sedentary at 24 weeks                                                                                                                                                                                                         |
| Avila et al, 2020, Belgium         | Experimental  | 90  | Home-based                                                        | Effects of cardiac rehabilitation on sedentary                                                                                                                                                                                                                                     |

|                                   |               |     |                                                                                          |                                                                                                                         |
|-----------------------------------|---------------|-----|------------------------------------------------------------------------------------------|-------------------------------------------------------------------------------------------------------------------------|
|                                   |               |     | 58.6 (13)<br>Center-based<br>61.9 (7.3)<br>Control group<br>61.7 (7.7)                   | behavior in different places                                                                                            |
| Hu et al, 2020, China             | Observational | 400 | Sedentary behavior group<br>65.59 (5.38)<br>Non-sedentary behavior group<br>64.36 (5.61) | The degree of coronary artery lesions and the number of coronary artery lesions were associated with sedentary behavior |
| Hu et al, 2020, China             | Experimental  | 60  | Intervention group<br>67.07 (5.31)<br>Control group<br>66.03 (5.40)                      | Motivational interviewing reduced sedentary behavior in older patients with coronary artery disease                     |
| den Uijl et al, 2020, Netherlands | Observational | 359 | Normal Weight<br>60.0 (9.9)<br>Overweight<br>57.5 (8.6)<br>Obese<br>56.3 (8.5)           | Participants with obesity spent more time in sedentary behavior                                                         |
| Foccardi et al, 2021, Italy       | Experimental  | 32  | Intervention group<br>61.4 (8.9)<br>Control group<br>61.1 (10.6)                         | Text messaging reduced sedentary behavior                                                                               |
| Chen et al, 2021, China           | Observational | 850 | 60-89 years old                                                                          | Frailty was associated with sedentary behavior                                                                          |
| Song , 2022, China                | Qualitative   | 14  | 68.21 (7.21)                                                                             | There were 3 main themes of factors affecting sedentary behavior change in patients with                                |

|                                    |               |     |                                                           |                                                                                                                                                                                                                                           |
|------------------------------------|---------------|-----|-----------------------------------------------------------|-------------------------------------------------------------------------------------------------------------------------------------------------------------------------------------------------------------------------------------------|
|                                    |               |     |                                                           | coronary artery disease: low self-efficacy, insufficient motivation for behavior, insufficient social support                                                                                                                             |
| van Bakel et al, 2023, Netherlands | Observational | 165 | 65 (10)                                                   | Sedentary time was high during hospitalization but substantially decreased following transition to the home environment                                                                                                                   |
| van Bakel et al, 2023, Netherlands | Experimental  | 212 | Intervention group<br>63 (10)<br>Control group<br>64 (10) | Intervention group participants received a 12-week, nurse-delivered, hybrid behaviour change intervention in combination with a pocket-worn activity tracker connected to a smartphone application to continuously monitor sedentary time |
| Won et al, 2023, Korea             | Observational | 111 | 75.44 (6.51)                                              | Low left ventricular ejection fraction and obesity were associated with sedentary behavior                                                                                                                                                |
| Wang et al, 2023, China            | Observational | 154 | ≥18 years old                                             | Marital status, plasma D-dimer, and functional disorders (exercise fear) were associated with sedentary behavior                                                                                                                          |
| Yao et al, 2023, China             | Observational | 378 | ≥45 years old                                             | Physical activity, objective support, support utilization, gender, literacy, and exercise fear were associated with sedentary behavior                                                                                                    |
